# Supplementary material for: Unique Profile of Proinflammatory Cytokines in Plasma of Drug-Naïve Individuals with Advanced HIV/TB Co-Infection
Source: MDPI journal article supplement (doi:10.3390/v15061330), 2023-06-06
Supplement: s1 [file s1]

**Supplementary Table S1. Representation of individuals with undetectable levels of proinflammatory cytokines among patients with acute HIV, TB and HIV/TB infections.**

| Cytokine      | Limit of detection (pg/ml) | Patients with HIV/TB (n=36) |                                    | Patients with HIV (n=36) |                                    | Patients with TB (n=35) |      | Percentage deviation |
|---------------|----------------------------|-----------------------------|------------------------------------|--------------------------|------------------------------------|-------------------------|------|----------------------|
|               |                            | n                           | %                                  | n                        | %                                  | n                       | %    |                      |
| IFN- $\gamma$ | 6.05                       | 8                           | 22.2<br><i>p=0.003<sup>a</sup></i> | 6                        | 16.7<br><i>p=0.003<sup>b</sup></i> | 0                       | 0    | 0.33                 |
| TNF- $\alpha$ | 1.5                        | 4                           | 11.1<br><i>p=0.04<sup>a</sup></i>  | 5                        | 13.8<br><i>p=0.003<sup>b</sup></i> | 0                       | 0    |                      |
| IL-1Beta      | 1.05                       | 4                           | 11.1<br><i>p=0.043<sup>a</sup></i> | 1                        | 2.8                                | 0                       | 0    | 3                    |
| IL-8          | 4                          | 0                           | 0                                  | 0                        | 0                                  | 0                       | 0    |                      |
| IL-12         | 4.75                       | 6                           | 16.7                               | 4                        | 11.1                               | 4                       | 11.4 | 0.5                  |
| IL-15         | 3.8                        | 4                           | 11.1<br><i>p=0.043<sup>a</sup></i> | 1                        | 1                                  | 0                       | 0    | 3                    |
| IL-17         | 2.9                        | 0                           | 0                                  | 0                        | 0                                  | 0                       | 0    |                      |
| IL-18         | 92.5                       | 0                           | 0                                  | 0                        | 0                                  | 0                       | 0    |                      |

If undetectable, cytokine levels were replaced by the value equal to half of the lower limit of detection for cytokine in question, according to the instructions of the manufacturer. <sup>a</sup> – p value for the difference between HIV/TB and TB patient groups; <sup>b</sup> – p value for the difference between HIV and TB patient groups in comparison by F-test (STATISTICA). No difference was revealed in other pair-wise comparisons.

**Supplemental Table S2. Severity of TB manifestations in HIV/TB co-infected patients (n=36) can be predicted by the plasma levels of IL-17 and IFN-g.**

| N=36      | b*        | Standard error of b* | b        | Standard error of b | T(99)    | p-value  |
|-----------|-----------|----------------------|----------|---------------------|----------|----------|
| Intercept |           |                      | 100.9711 | 0.115078            | 877.4134 | 0.000000 |
| IL-17     | 0.914574  | 0.083975             | 0.0354   | 0.003253            | 10.8910  | 0.000000 |
| IFN-g     | -0.244292 | 0.081142             | -0.0095  | 0.003140            | -3.0107  | 0.005148 |
| CD4+      | 0.109803  | 0.081067             | 0.0003   | 0.000195            | 1.3545   | 0.185379 |
| IL-12     | 0.086330  | 0.079973             | 0.0026   | 0.002444            | 1.0795   | 0.288694 |

Regression Summary for Dependent Variable "TB Disseminated or not": R= 0.90062486; R<sup>2</sup>= 0.81112514; Adjusted R<sup>2</sup>= 0.78675419; F(4,31)=33.282 p=0.0000000000819138507; Std.Error of estimate: 0.23417; Include cases: 1:36

**Supplemental Table S3. Survival of drug naive patients with HIV/TB co-infection (n=36) in six months after the on-start treatment can be predicted by the plasma levels of IL-8.**

| N=36                      | b*       | Standard error of b* | b        | Standard error of b | T(99)    | p-value  |
|---------------------------|----------|----------------------|----------|---------------------|----------|----------|
| Intercept                 |          |                      | -8577.60 | 741.8936            | -11.5618 | 0.000000 |
| Death in 6 mths after ART | 0.893673 | 0.076955             | 84.31    | 7.2596              | 11.6130  | 0.000000 |

Regression Summary for Dependent Variable "IL-8": R=0.89367324 R<sup>2</sup>= .79865187; Adjusted R<sup>2</sup>= 0.79272986; F(1,34)=134.86; p=0.000000000000221791796; Std.Error of estimate: 17.239; Include cases: 1:36
